# Supplementary material for: Insights into the mechanism of the solvolysis of propylene oxide over titanium silicalite-1: a theoretical study
Source: Royal Society of Chemistry journal article supplement (doi:10.1039/d3cp01696j), 2023-01-01
Supplement: d3cp01696j1.pdf [file d3cp01696j1.pdf]

## Supporting Information

### **Insight into the mechanism of the solvolysis of propylene oxide over titanium silicalite-1: A theoretical study**

Qiaoyun Qin,<sup>a,b</sup> Hongxia Liu,<sup>c</sup> Yanke Guo,<sup>a,b</sup> Baohe Wang,<sup>a,b</sup> Jing Zhu,<sup>a,b,\*</sup> Jing Ma<sup>a,b,\*</sup>

<sup>a</sup> *Collaborative Innovation Center of Chemical Science and Engineering, Tianjin University, Tianjin 300072, China*

<sup>b</sup> *Key Laboratory for Green Chemical Technology of Ministry of Education, R&D Center for Petrochemical Technology, Tianjin University, Tianjin 300072, China*

<sup>c</sup> *School of Chemistry and Chemical Engineering, Wuhan Textile University, Wuhan, 430200, China*

---

\* Corresponding author at: No. 90 Weijin Road, Nankai District, Tianjin 300072, China. Tel.: + 86 22 27406959. Fax: +86 22 27406591 E-mail address: [majing0027@tju.edu.cn](mailto:majing0027@tju.edu.cn) (Jing Ma), [cj\\_zhu1975@tju.edu.cn](mailto:cj_zhu1975@tju.edu.cn) (Jing Zhu)

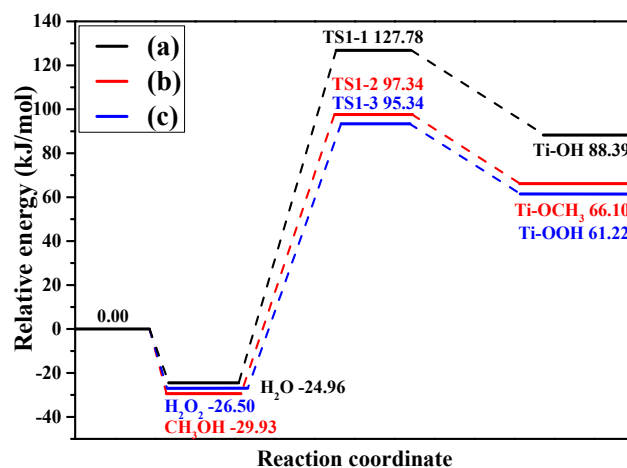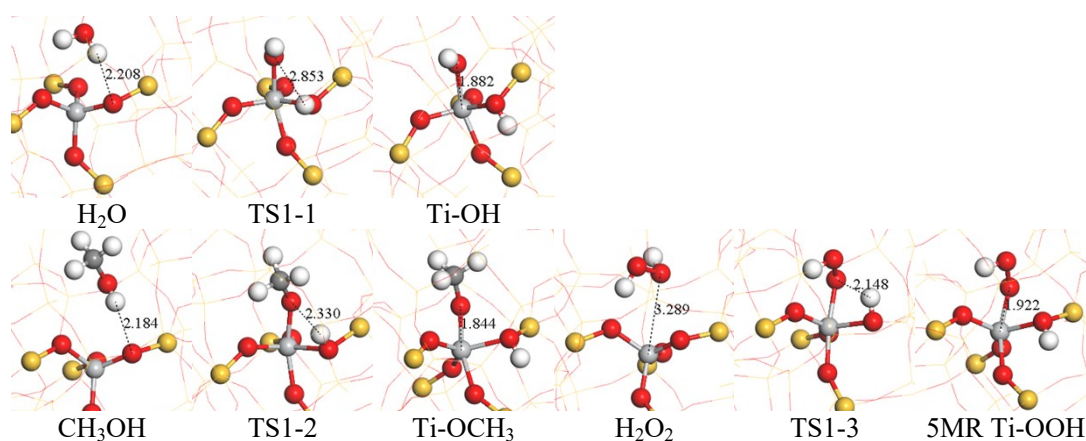

**Fig. S1** Potential energy profiles for formations of ring-opening active substances (a) Ti-OH, (b) Ti-CH<sub>3</sub> and (c) 5MR Ti-OOH at 313 K together with together with the structures of reactant, transition state and product at tetrahedral Ti site. The energy unit is in kJ/mol, and bond length is in Å. (Ti = light grey, C = grey, O = red, Si = yellow, H = white).

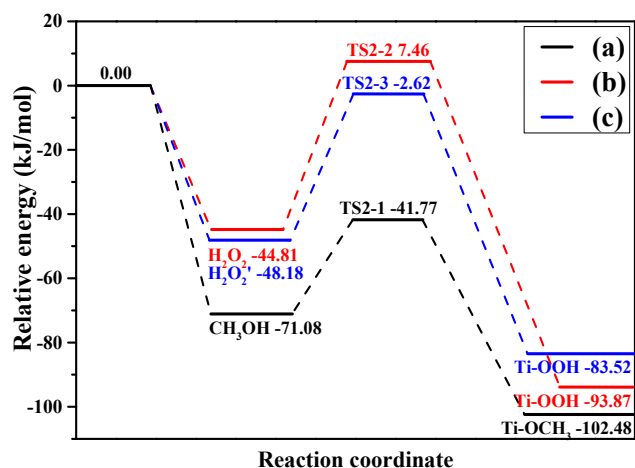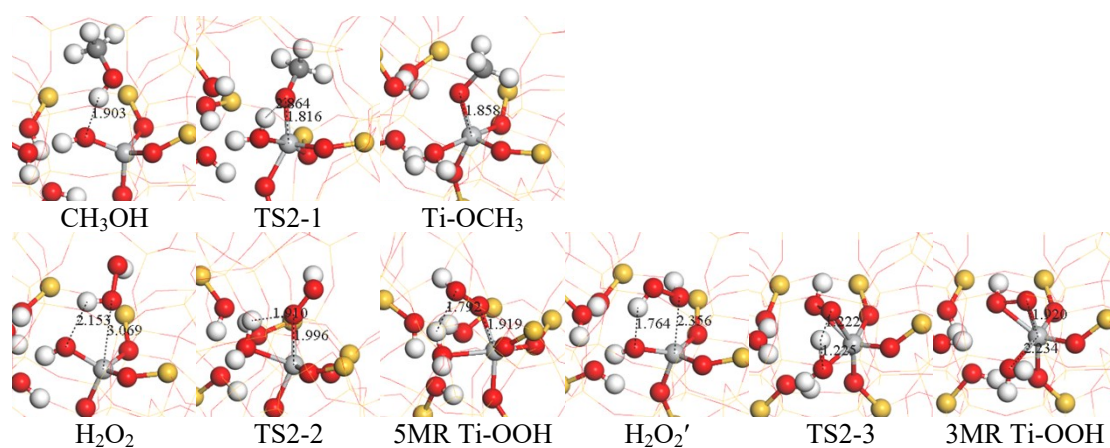

**Fig. S2** Potential energy profiles for formation of ring-opening active substances (a) Ti-OCH<sub>3</sub>, (b) 5MR Ti-OOH and (c) 3MR Ti-OOH at 313 K together with together with the structures of reactant, transition state and product at Ti/defect site. The energy unit is in kJ/mol, and bond length is in Å. (Ti = light grey, C = grey, O = red, Si = yellow, H = white).

Tetrahedral Ti site

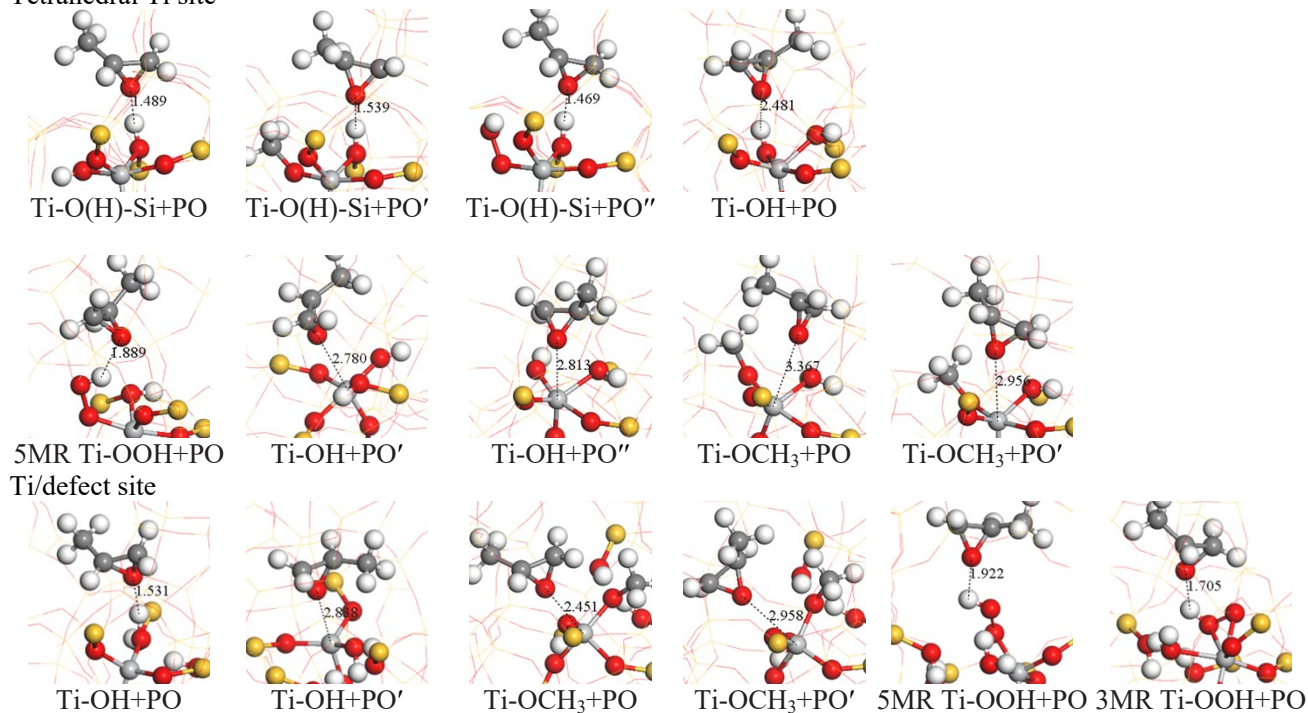

**Fig. S3** The stable adsorption configurations of PO over Ti-O(H)-Si, Ti-OH, Ti-OCH<sub>3</sub>, 5MR Ti-OOH and 3MR Ti-OOH together with the corresponding adsorption free energies at 313 K. The energy unit is in kJ/mol, and bond length is in Å. (Ti = light grey, C = grey, O = red, Si = yellow, H = white).

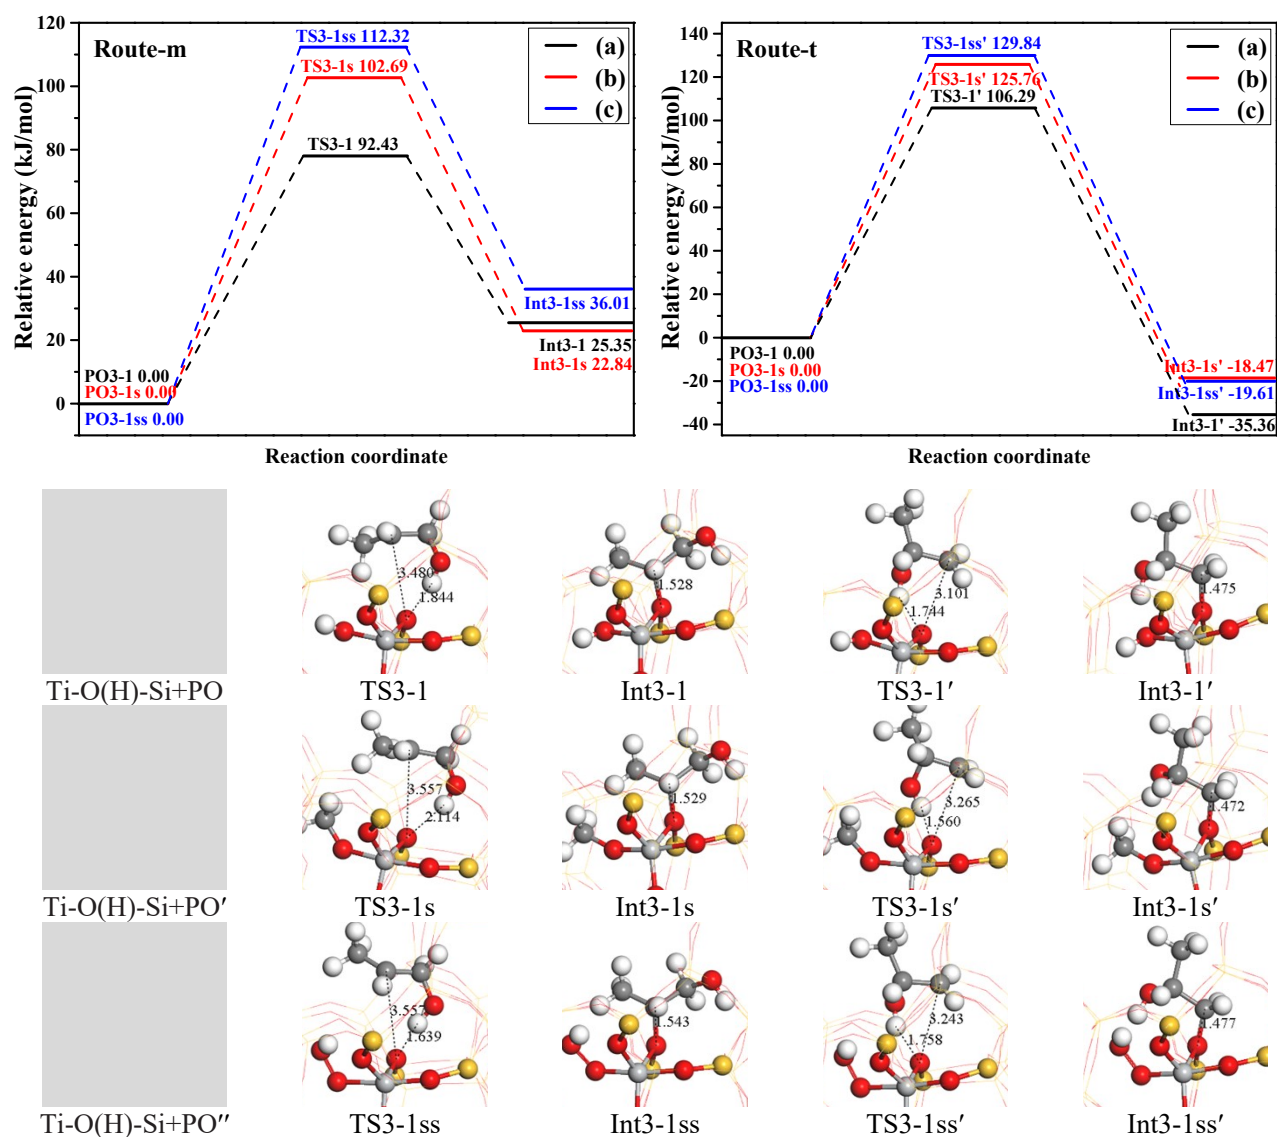

**Fig. S4** Potential energy profiles for the Brønsted acid reactions mode of ring-opening of PO with Ti-O(H)-Si adjacent to (a) -OH, (b) -OCH<sub>3</sub> and (c) -OOH groups at 313 K together with together with the structures of reactant, transition state and product at tetrahedral Ti site. The energy unit is in kJ/mol, and bond length is in Å. (Ti = light grey, C = grey, O = red, Si = yellow, H = white).

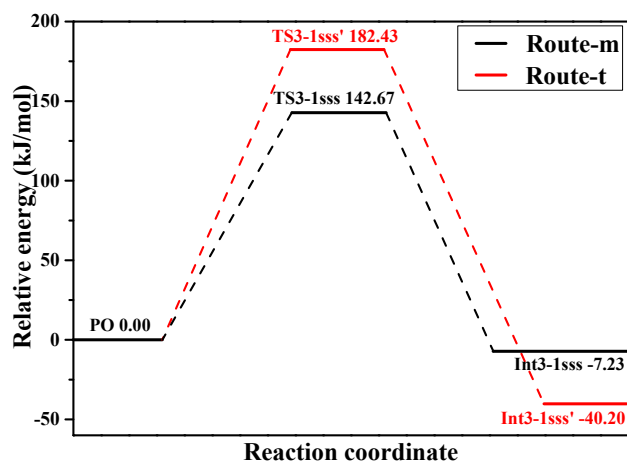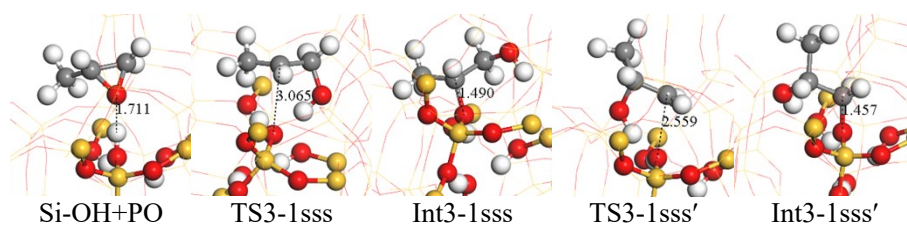

**Fig. S5** Potential energy profiles for the Brønsted acid reactions mode of ring-opening of PO with Si-OH at 313 K together with together with the structures of reactant, transition state and product. The energy unit is in kJ/mol, and bond length is in Å. (C = grey, O = red, Si = yellow, H = white).

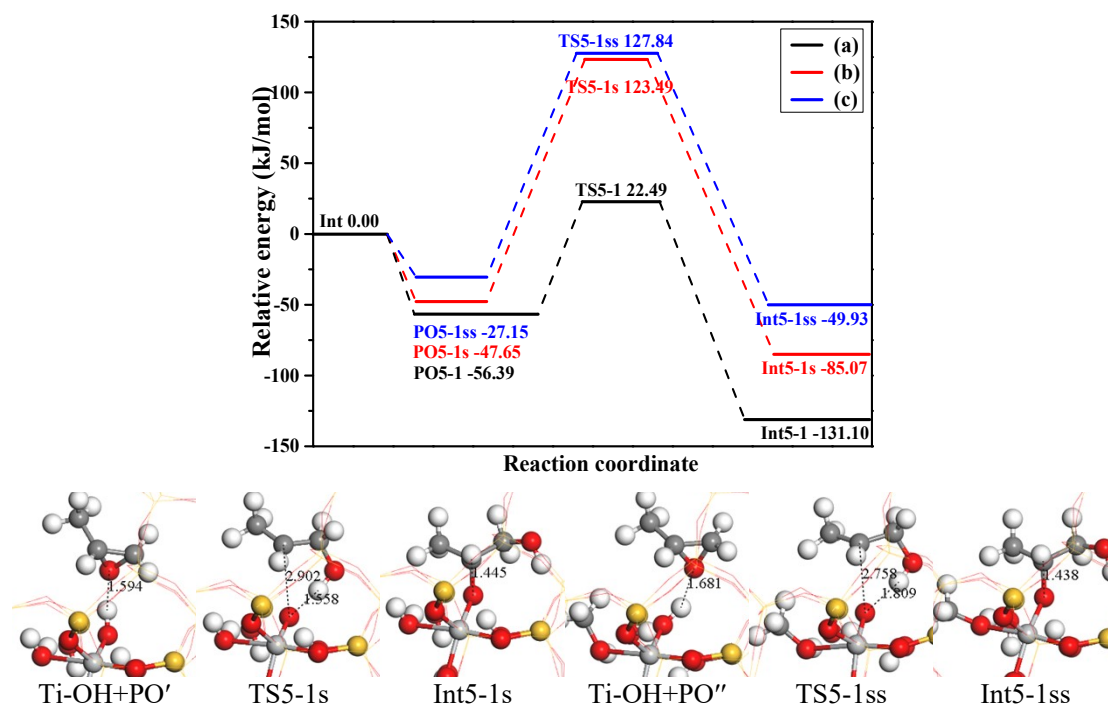

**Fig. S6** Potential energy profiles for the Brønsted acid reactions mode of ring-opening of PO with Ti-OH when co-adsorption with a (b) H<sub>2</sub>O or (c) CH<sub>3</sub>OH at 313 K together with together with the structures of reactant, transition state and product at Ti/defect site. The energy unit is in kJ/mol, and bond length is in Å. (Ti = light grey, C = grey, O = red, Si = yellow, H = white).



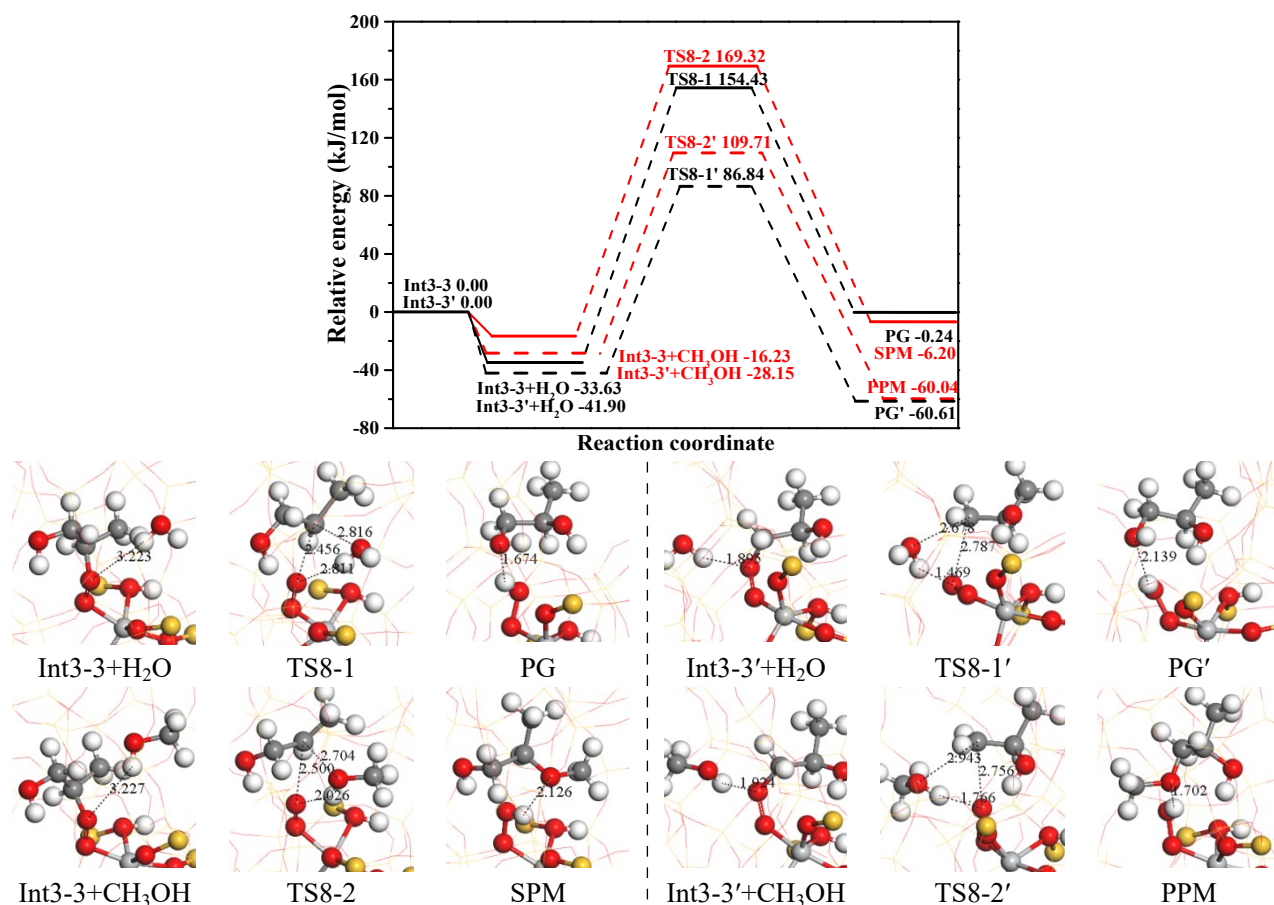

**Fig. S7** Potential energy profiles of PG, SPM and PPM formation via 5MR Ti-OOH at 313 K, together with the structures of reactant, transition state and product at tetrahedral Ti site. The energy unit is in kJ/mol, and bond length is in Å. (Ti = light grey, C = grey, O = red, Si = yellow, H = white).



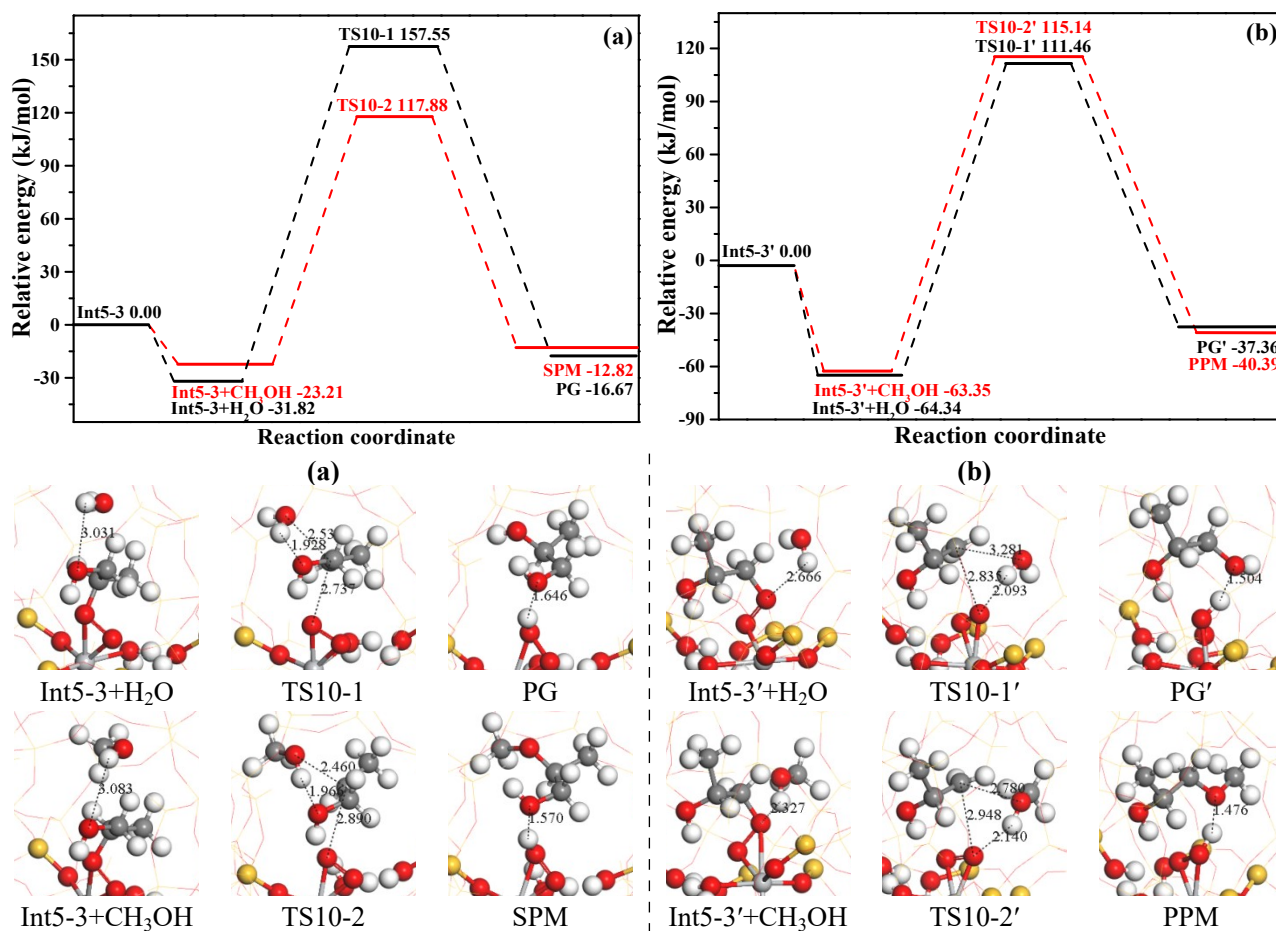

**Fig. S8** Potential energy profiles of PG and MME formation via 3MR Ti-OOH at 313 K together with together with the structures of reactant, transition state and product at Ti/defect site. The energy unit is in kJ/mol, and bond length is in Å (Ti = light grey, C = grey, O = red, Si = yellow, H = white).

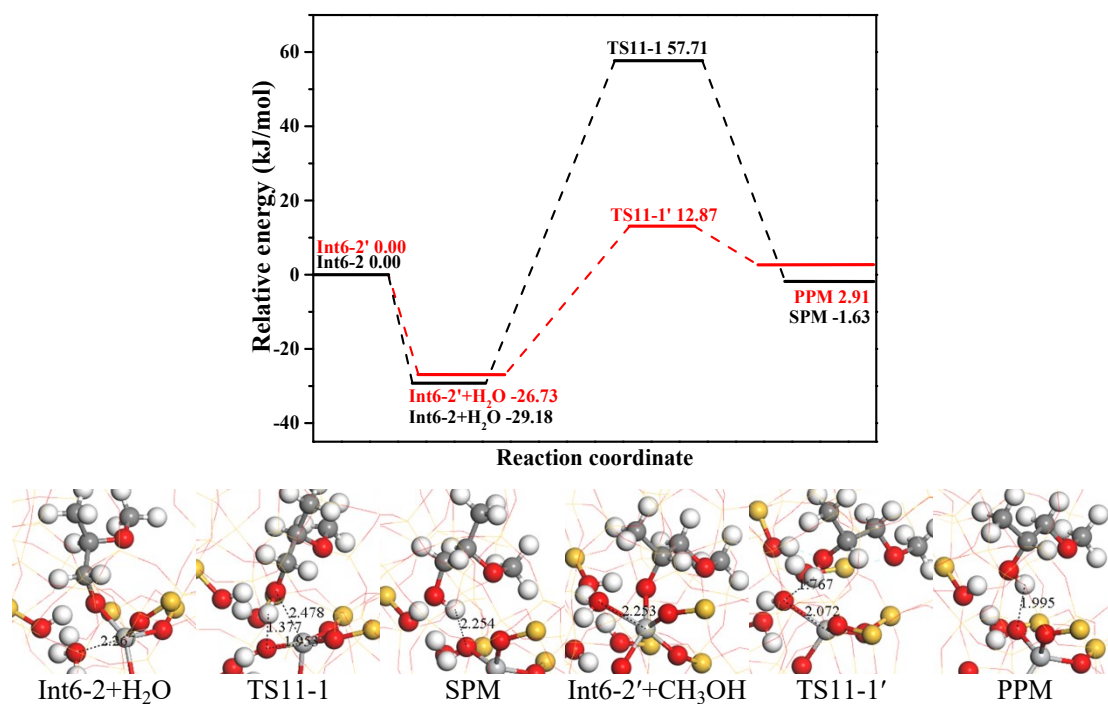

**Fig. S9** Potential energy profiles for MME formation *via* hydrolysis of Int6-2 and Int6-2' at 313 K together with the structures of reactant, transition state and product at Ti/defect site. The energy unit is in kJ/mol, and bond length is in Å. (Ti = light grey, C = grey, O = red, Si = yellow, H = white).

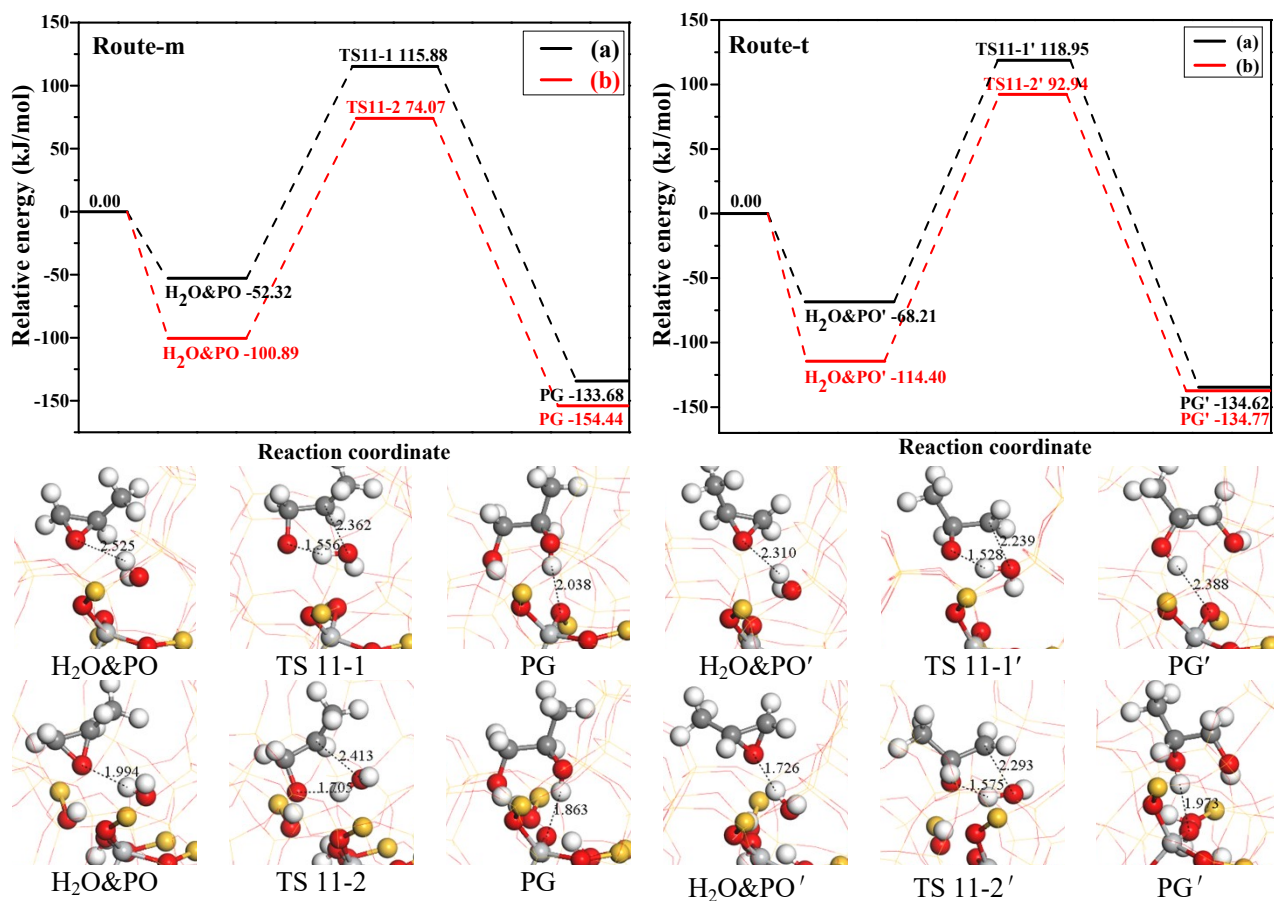

**Fig. S10** Potential energy profiles for PG formation *via* concerted mechanism at 313 K together with together with the structures of reactant, transition state and product at (a) tetrahedral Ti and (b) Ti/defect sites. The energy unit is in kJ/mol, and bond length is in Å. (Ti = light grey, C = grey, O = red, Si = yellow, H = white).

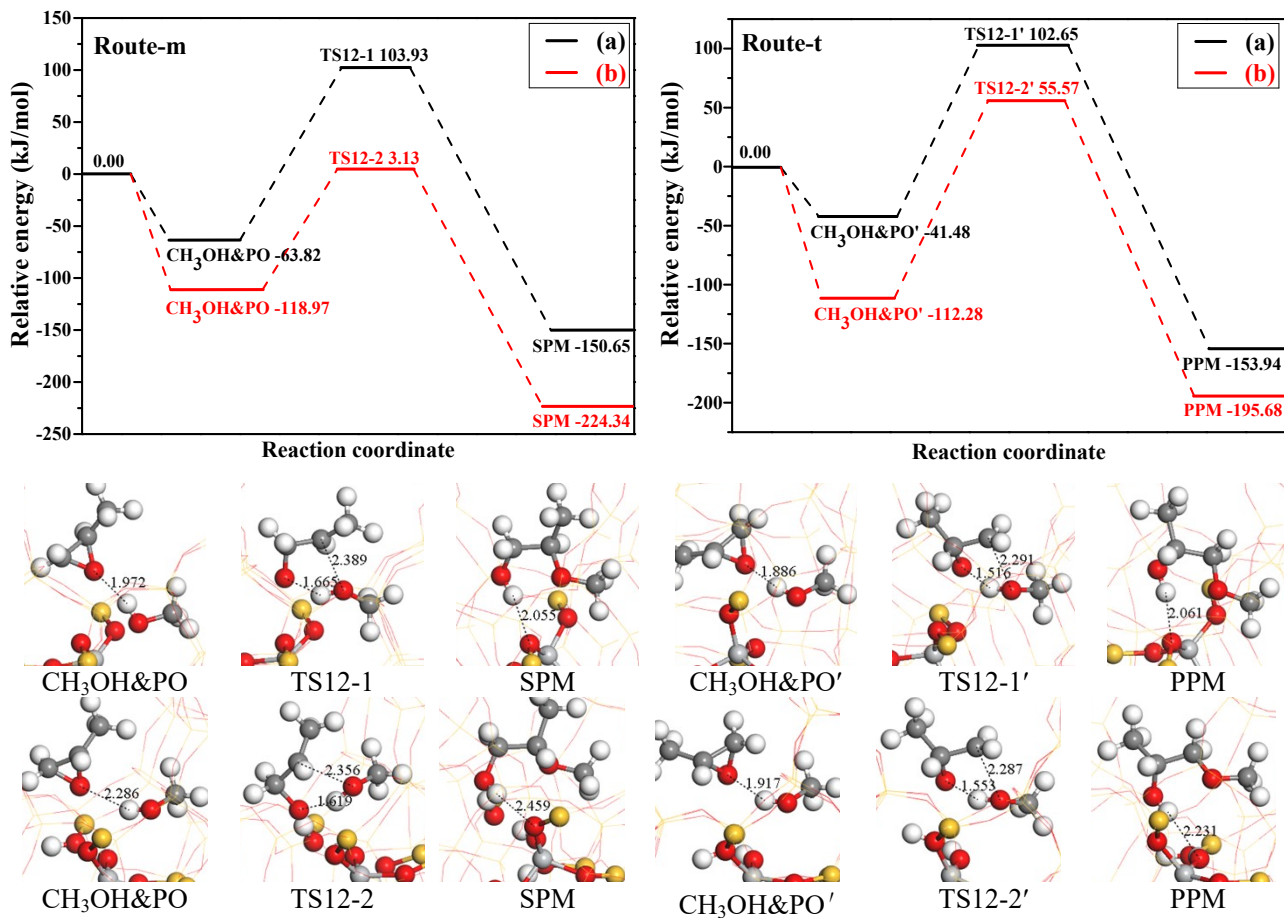

**Fig. S11** Potential energy profiles for SPM and PPM formations *via* concerted mechanism at 313 K together with the structures of reactant, transition state and product at (a) tetrahedral Ti and (b) Ti/defect sites. The energy unit is in kJ/mol, and bond length is in Å. (Ti = light grey, C = grey, O = red, Si = yellow, H = white).

**Table S1** The corresponding activation free energy ( $G_a$ , kJ/mol), reaction free energies ( $\Delta G$ , kJ/mol) and the only one imaginary frequency of transition states ( $\nu$ , cm<sup>-1</sup>) of ring-opening active substances formation at tetrahedral Ti and Ti/defect sites (T=313 K).

| TS-1 models      | TSs   | $G_a$ , kJ/mol | $\Delta G$ , kJ/mol | $\nu$ , cm <sup>-1</sup> |
|------------------|-------|----------------|---------------------|--------------------------|
| Tetrahedral site | TS1-1 | 152.74         | 113.35              | -316.51                  |
|                  | TS1-2 | 127.26         | 96.03               | -1058.56                 |
|                  | TS1-3 | 121.84         | 87.72               | -1034.42                 |
| Ti/defect site   | TS2-1 | 29.31          | -31.40              | -630.65                  |
|                  | TS2-1 | 45.56          | -35.34              | -658.59                  |
|                  | TS2-3 | 59.04          | -49.06              | -793.13                  |

**Table S2** The corresponding activation free energy ( $G_a$ , kJ/mol), reaction free energies ( $\Delta G$ , kJ/mol) and the only one imaginary frequency of transition states ( $\nu$ , cm<sup>-1</sup>) for Brønsted acid reaction mode of PO with Ti-OH at tetrahedral Ti and Ti/defect sites (T=313 K).

| TS-1 models         | TSs    | $G_a$ , kJ/mol | $\Delta G$ , kJ/mol | $\nu$ , cm <sup>-1</sup> |
|---------------------|--------|----------------|---------------------|--------------------------|
| Tetrahedral Ti site | TS3-1  | 92.43          | 25.35               | -262.35                  |
|                     | TS3-1' | 106.27         | -35.36              | -450.01                  |
|                     | TS3-2  | 102.31         | -43.81              | -354.92                  |
|                     | TS3-2' | 125.66         | -67.65              | -452.37                  |
| Ti/defect site      | TS5-1  | 78.88          | -74.71              | -444.37                  |
|                     | TS5-1' | 136.44         | -72.77              | -498.61                  |

**Table S3** The corresponding activation free energy ( $G_a$ , kJ/mol), reaction free energies ( $\Delta G$ , kJ/mol) and the only one imaginary frequency of transition states ( $\nu$ , cm<sup>-1</sup>) for Lewis acid reaction mode of PO with Ti-OH over tetrahedral Ti and Ti/defect sites (T=313 K).

| TS-1 models      | TSs    | $G_a$ , kJ/mol | $\Delta G$ , kJ/mol | $\nu$ , cm <sup>-1</sup> |
|------------------|--------|----------------|---------------------|--------------------------|
| Tetrahedral site | TS4-1  | 167.80         | -29.99              | -342.06                  |
|                  | TS4-1' | 160.68         | -21.71              | -508.35                  |
| Ti/defect site   | TS6-1  | 106.51         | -89.74              | -234.90                  |
|                  | TS6-1' | 124.20         | -73.49              | -499.54                  |

**Table S4** The corresponding activation free energy ( $G_a$ , kJ/mol), reaction free energies ( $\Delta G$ , kJ/mol) and the only one imaginary frequency of transition states ( $\nu$ , cm<sup>-1</sup>) for Lewis acid reaction mode of PO with Ti-OCH<sub>3</sub> at tetrahedral Ti and Ti/defect sites (T=313 K).

| TS-1 models      | TSs    | $G_a$ , kJ/mol | $\Delta G$ , kJ/mol | $\nu$ , cm <sup>-1</sup> |
|------------------|--------|----------------|---------------------|--------------------------|
| Tetrahedral site | TS5-1  | 263.18         | -41.22              | -303.27                  |
|                  | TS5-1' | 289.62         | -41.90              | -318.17                  |
| Ti/ddefect site  | TS6-2  | 89.41          | -88.19              | -286.60                  |
|                  | TS6-2' | 132.11         | -95.69              | -329.57                  |

**Table S5** The corresponding activation free energy ( $G_a$ , kJ/mol), reaction free energies ( $\Delta G$ , kJ/mol) and the only one imaginary frequency of transition states ( $\nu$ , cm<sup>-1</sup>) for PO with Ti-OOH at tetrahedral Ti and Ti/defect sites (T=313 K).

| TS-1 models      | TSs    | $G_a$ , kJ/mol | $\Delta G$ , kJ/mol | $\nu$ , cm <sup>-1</sup> |
|------------------|--------|----------------|---------------------|--------------------------|
| Tetrahedral site | TS3-3  | 134.25         | -17.50              | -352.27                  |
|                  | TS3-3' | 153.70         | -24.23              | -368.42                  |
| Ti/ddefect site  | TS5-2  | 120.55         | -76.51              | -378.37                  |
|                  | TS5-2' | 217.83         | -40.41              | -481.83                  |
|                  | TS5-3  | 52.52          | -123.66             | -281.55                  |
|                  | TS5-3' | 90.80          | -96.23              | -326.91                  |

**Table S6** The corresponding activation free energy ( $G_a$ , kJ/mol), reaction free energies ( $\Delta G$ , kJ/mol) and the only one imaginary frequency of transition states ( $\nu$ ,  $\text{cm}^{-1}$ ) for PG formation via stepwise mechanism at tetrahedral Ti and Ti/defect sites (T=313 K).

| TS-1 models      | TSs     | $G_a$ , kJ/mol | $\Delta G$ , kJ/mol | $\nu$ , $\text{cm}^{-1}$ |
|------------------|---------|----------------|---------------------|--------------------------|
| Tetrahedral site | TS7-1   | 21.36          | -93.55              | -309.33                  |
|                  | TS7-1'  | 30.46          | -49.56              | -325.64                  |
|                  | TS8-1   | 188.06         | 33.38               | -332.83                  |
|                  | TS8-1'  | 128.75         | -18.70              | -280.02                  |
| Ti/defect site   | TS9-1   | 50.19          | 28.46               | -151.31                  |
|                  | TS9-1'  | 73.29          | 65.45               | -218.87                  |
|                  | TS9-2   | 72.24          | 43.86               | -253.81                  |
|                  | TS9-2'  | 42.18          | 8.47                | -214.09                  |
|                  | TS10-1  | 189.37         | 15.15               | -269.82                  |
|                  | TS10-1' | 175.80         | 26.98               | -234.44                  |

**Table S7** The corresponding activation free energy ( $G_a$ , kJ/mol), reaction free energies ( $\Delta G$ , kJ/mol) and the only one imaginary frequency of transition states ( $\nu$ ,  $\text{cm}^{-1}$ ) for MME formation via stepwise mechanism at tetrahedral Ti and Ti/defect sites (T=313 K).

| TS-1 models      | TSs     | $G_a$ , kJ/mol | $\Delta G$ , kJ/mol | $\nu$ , $\text{cm}^{-1}$ |
|------------------|---------|----------------|---------------------|--------------------------|
| Tetrahedral site | TS7-2   | 11.67          | -99.10              | -281.14                  |
|                  | TS7-2'  | 34.93          | -32.95              | -345.37                  |
|                  | TS8-2   | 185.55         | 10.04               | -364.02                  |
|                  | TS8-2'  | 137.86         | -31.89              | -345.37                  |
| Ti/defect site   | TS9-3   | 188.24         | -8.99               | -337.34                  |
|                  | TS9-3'  | 146.29         | -17.15              | -290.49                  |
|                  | TS10-2  | 141.09         | 10.39               | -294.66                  |
|                  | TS10-2' | 178.49         | 22.96               | -327.77                  |
|                  | TS11-1  | 86.89          | 27.56               | -302.84                  |
|                  | TS11-1' | 39.60          | 29.64               | -300.94                  |



**Table S8** The corresponding activation free energy ( $G_a$ , kJ/mol), reaction free energies ( $\Delta G$ , kJ/mol) and the only one imaginary frequency of transition states ( $\nu$ , cm<sup>-1</sup>) of MME formation *via* concerted mechanism at tetrahedral Ti and Ti/defect sites (T=313 K).

| TS-1 models      | TSs     | $G_a$ , kJ/mol | $\Delta G$ , kJ/mol | $\nu$ , cm <sup>-1</sup> |
|------------------|---------|----------------|---------------------|--------------------------|
| Tetrahedral site | TS11-1  | 168.20         | -81.36              | -464.38                  |
|                  | TS11-1' | 187.16         | -66.41              | -556.30                  |
| Ti/ddefect site  | TS11-2  | 174.96         | -53.55              | -412.72                  |
|                  | TS11-2' | 207.34         | -83.40              | -448.98                  |

**Table S9** The corresponding activation free energy ( $G_a$ , kJ/mol), reaction free energies ( $\Delta G$ , kJ/mol) and the only one imaginary frequency of transition states ( $\nu$ , cm<sup>-1</sup>) of MME formation *via* concerted mechanism at tetrahedral Ti and Ti/defect sites (T=313 K).

| TS-1 models      | TSs     | $G_a$ , kJ/mol | $\Delta G$ , kJ/mol | $\nu$ , cm <sup>-1</sup> |
|------------------|---------|----------------|---------------------|--------------------------|
| Tetrahedral site | TS12-1  | 167.75         | -86.83              | -544.34                  |
|                  | TS12-1' | 144.13         | -112.46             | -517.88                  |
| Ti/ddefect site  | TS12-2  | 122.10         | -105.37             | -562.16                  |
|                  | TS12-1' | 167.85         | -83.40              | -534.01                  |
